# Supplementary material for: Pathogenic Tau Causes a Toxic Depletion of Nuclear Calcium
Source: PubMed Central journal article supplement — Cell Rep. Author manuscript; Available in PMC 2020 Aug 16. (PMC7428851; doi:10.1016/j.celrep.2020.107900), 2020-07-14
Supplement: NIHMS1612497-supplement-1.pdf [file NIHMS1612497-supplement-1.pdf]

**Cell Reports, Volume 32**

**Supplemental Information**

**Pathogenic Tau Causes a Toxic Depletion  
of Nuclear Calcium**

**Rebekah Mahoney, Elizabeth Ochoa Thomas, Paulino Ramirez, Henry E. Miller, Adrian Beckmann, Gabrielle Zuniga, Radek Dobrowolski, and Bess Frost**

SUPPLEMENTAL FIGURES

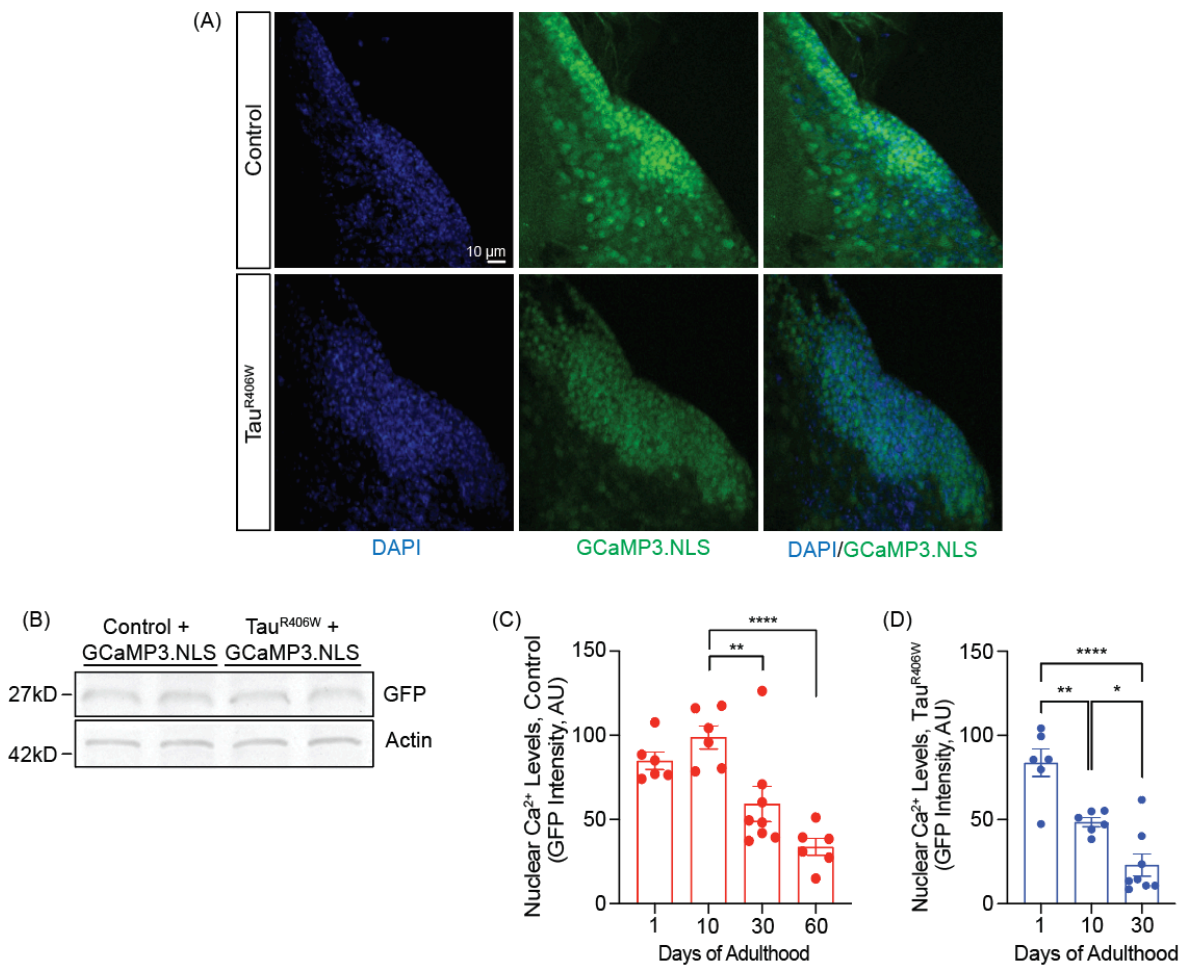

**Supplemental Figure 1 | GCaMP3.NLS controls and age-dependent reduction in nuclear Ca<sup>2+</sup>. Related to Figure 2.**

(A) Visualization of nuclear Ca<sup>2+</sup> via GCaMP3.NLS in cells of the mushroom body of dissected brains from control and tau<sup>R406W</sup> transgenic *Drosophila* at day 10 of adulthood. Images are a single focal plane.

(B) GFP levels are unchanged between control and tau<sup>R406W</sup> transgenic *Drosophila* harboring the GCaMP3.NLS Ca<sup>2+</sup> indicator at day 10 of adulthood.

(C) Quantification of nuclear Ca<sup>2+</sup> in control *Drosophila* based on GCaMP3.NLS at the indicated age, n=6 per genotype, per age.

(D) Quantification of nuclear Ca<sup>2+</sup> in tau<sup>R406W</sup> transgenic *Drosophila* based on GCaMP3.NLS at the indicated age, n=6 per genotype, per age.

Data presented as mean ± SEM; one-way ANOVA with Tukey's multiple comparison test; \*p < 0.05, \*\*p < 0.01, \*\*\*\*p < 0.0001.

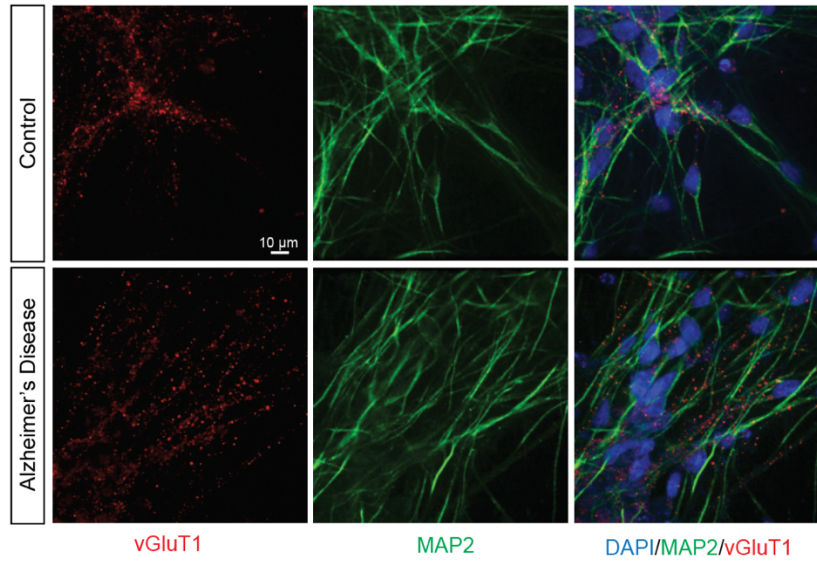

**Supplemental Figure 2 | iPSC-derived neurons from control and sporadic Alzheimer's disease express markers of neuronal differentiation. Related to Figure 3.**

iPSCs from control patients and patients with sporadic Alzheimer's disease were differentiated into excitatory forebrain neurons and stained with antibodies detecting vGluT1 and MAP2.
